# Supplementary material for: Exploring use of unsupervised clustering to associate signaling profiles of GPCR ligands to clinical response
Source: PubMed Central journal article supplement (PMC6733853; doi:10.1038/s41467-019-11875-6), 2019-09-09
Supplement: 41467_2019_11875_MOESM15_ESM.pdf [file 41467_2019_11875_MOESM15_ESM.pdf]

## Reporting Summary

Nature Research wishes to improve the reproducibility of the work that we publish. This form provides structure for consistency and transparency in reporting. For further information on Nature Research policies, see [Authors & Referees](#) and the [Editorial Policy Checklist](#).

### Statistics

For all statistical analyses, confirm that the following items are present in the figure legend, table legend, main text, or Methods section.

n/a Confirmed

- |                                     |                                     |                                                                                                                                                                                                                                                            |
|-------------------------------------|-------------------------------------|------------------------------------------------------------------------------------------------------------------------------------------------------------------------------------------------------------------------------------------------------------|
| <input type="checkbox"/>            | <input checked="" type="checkbox"/> | The exact sample size ( $n$ ) for each experimental group/condition, given as a discrete number and unit of measurement                                                                                                                                    |
| <input type="checkbox"/>            | <input checked="" type="checkbox"/> | A statement on whether measurements were taken from distinct samples or whether the same sample was measured repeatedly                                                                                                                                    |
| <input type="checkbox"/>            | <input checked="" type="checkbox"/> | The statistical test(s) used AND whether they are one- or two-sided<br><i>Only common tests should be described solely by name; describe more complex techniques in the Methods section.</i>                                                               |
| <input type="checkbox"/>            | <input checked="" type="checkbox"/> | A description of all covariates tested                                                                                                                                                                                                                     |
| <input checked="" type="checkbox"/> | <input type="checkbox"/>            | A description of any assumptions or corrections, such as tests of normality and adjustment for multiple comparisons                                                                                                                                        |
| <input type="checkbox"/>            | <input checked="" type="checkbox"/> | A full description of the statistical parameters including central tendency (e.g. means) or other basic estimates (e.g. regression coefficient) AND variation (e.g. standard deviation) or associated estimates of uncertainty (e.g. confidence intervals) |
| <input checked="" type="checkbox"/> | <input type="checkbox"/>            | For null hypothesis testing, the test statistic (e.g. $F$ , $t$ , $r$ ) with confidence intervals, effect sizes, degrees of freedom and $P$ value noted<br><i>Give <math>P</math> values as exact values whenever suitable.</i>                            |
| <input checked="" type="checkbox"/> | <input type="checkbox"/>            | For Bayesian analysis, information on the choice of priors and Markov chain Monte Carlo settings                                                                                                                                                           |
| <input checked="" type="checkbox"/> | <input type="checkbox"/>            | For hierarchical and complex designs, identification of the appropriate level for tests and full reporting of outcomes                                                                                                                                     |
| <input checked="" type="checkbox"/> | <input type="checkbox"/>            | Estimates of effect sizes (e.g. Cohen's $d$ , Pearson's $r$ ), indicating how they were calculated                                                                                                                                                         |

*Our web collection on [statistics for biologists](#) contains articles on many of the points above.*

### Software and code

Policy information about [availability of computer code](#)

Data collection

Adverse event reporting system (AERS)- FDA

Data analysis

Software used for linear correlations, curve fitting and extraction of pharmacodynamic parameters: Graphpad 6; Excel.  
All clustering and cluster comparisons were conducted using Python 2.7.6. Complete source code is available for download at <http://github.com/JonathanGallion/Benredjem-Gallion>

For manuscripts utilizing custom algorithms or software that are central to the research but not yet described in published literature, software must be made available to editors/reviewers. We strongly encourage code deposition in a community repository (e.g. GitHub). See the Nature Research [guidelines for submitting code & software](#) for further information.

### Data

Policy information about [availability of data](#)

All manuscripts must include a [data availability statement](#). This statement should provide the following information, where applicable:

- Accession codes, unique identifiers, or web links for publicly available datasets
- A list of figures that have associated raw data
- A description of any restrictions on data availability

All data generated or analyzed in this study are included in the article and supplementary materials or provided as source data files.

## Field-specific reporting

Please select the one below that is the best fit for your research. If you are not sure, read the appropriate sections before making your selection.

Life sciences     Behavioural & social sciences     Ecological, evolutionary & environmental sciences

For a reference copy of the document with all sections, see [nature.com/documents/nr-reporting-summary-flat.pdf](https://www.nature.com/documents/nr-reporting-summary-flat.pdf)

## Life sciences study design

All studies must disclose on these points even when the disclosure is negative.

|                 |                                                                                                                                                                                                                                                                                                                                                                 |
|-----------------|-----------------------------------------------------------------------------------------------------------------------------------------------------------------------------------------------------------------------------------------------------------------------------------------------------------------------------------------------------------------|
| Sample size     | Sample size used was according to standards used in drug screening ranging from n=3-7, except internal standards (Met-ENK), that were ran in all experiments                                                                                                                                                                                                    |
| Data exclusions | Data were excluded only upon evidence of technical difficulties: i.e.: lack of biosensor transfection as indicated by lack of luminescence or total fluorescence readings.                                                                                                                                                                                      |
| Replication     | All BRET biosensors used in the study had been validated in previous publications so readouts were inherently reproducible. All data included in the study was reproducible within the n tested.                                                                                                                                                                |
| Randomization   | 25 different ligands were tested in human and rat MOR and 21 ligands in human and rat DOR using 10 different BRET readouts. Experiments were carried out in two different laboratories. Drugs, receptors and biosensors were randomly tested between the two labs in a ratio of 1:3 (Bouvier:Pineyro Labs). Guinea pig ileum assays were all run at Pfizer Inc. |
| Blinding        | Experiments were run manually and experimenters who run the experiments also analyzed their own data. There was no blind fold for curve fitting but fitting criteria were fixed a priori guided curve fitting throughout the study.                                                                                                                             |

## Behavioural & social sciences study design

All studies must disclose on these points even when the disclosure is negative.

|                   |                                                                         |
|-------------------|-------------------------------------------------------------------------|
| Study description | This study did not include a behavioural & social sciences study design |
| Research sample   | This study did not include a behavioural & social sciences study design |
| Sampling strategy | This study did not include a behavioural & social sciences study design |
| Data collection   | This study did not include a behavioural & social sciences study design |
| Timing            | This study did not include a behavioural & social sciences study design |
| Data exclusions   | This study did not include a behavioural & social sciences study design |
| Non-participation | This study did not include a behavioural & social sciences study design |
| Randomization     | This study did not include a behavioural & social sciences study design |

## Ecological, evolutionary & environmental sciences study design

All studies must disclose on these points even when the disclosure is negative.

|                          |                                                                                              |
|--------------------------|----------------------------------------------------------------------------------------------|
| Study description        | This study did not include an ecological, evolutionary & environmental sciences study design |
| Research sample          | This study did not include an ecological, evolutionary & environmental sciences study design |
| Sampling strategy        | This study did not include an ecological, evolutionary & environmental sciences study design |
| Data collection          | This study did not include an ecological, evolutionary & environmental sciences study design |
| Timing and spatial scale | This study did not include an ecological, evolutionary & environmental sciences study design |
| Data exclusions          | This study did not include an ecological, evolutionary & environmental sciences study design |

Reproducibility

Randomization

Blinding

Did the study involve field work?  Yes  No

## Field work, collection and transport

Field conditions

Location

Access and import/export

Disturbance

## Reporting for specific materials, systems and methods

We require information from authors about some types of materials, experimental systems and methods used in many studies. Here, indicate whether each material, system or method listed is relevant to your study. If you are not sure if a list item applies to your research, read the appropriate section before selecting a response.

### Materials & experimental systems

| n/a                                 | Included in the study                                           |
|-------------------------------------|-----------------------------------------------------------------|
| <input checked="" type="checkbox"/> | <input type="checkbox"/> Antibodies                             |
| <input type="checkbox"/>            | <input checked="" type="checkbox"/> Eukaryotic cell lines       |
| <input checked="" type="checkbox"/> | <input type="checkbox"/> Palaeontology                          |
| <input type="checkbox"/>            | <input checked="" type="checkbox"/> Animals and other organisms |
| <input checked="" type="checkbox"/> | <input type="checkbox"/> Human research participants            |
| <input checked="" type="checkbox"/> | <input type="checkbox"/> Clinical data                          |

### Methods

| n/a                                 | Included in the study                           |
|-------------------------------------|-------------------------------------------------|
| <input checked="" type="checkbox"/> | <input type="checkbox"/> ChIP-seq               |
| <input checked="" type="checkbox"/> | <input type="checkbox"/> Flow cytometry         |
| <input checked="" type="checkbox"/> | <input type="checkbox"/> MRI-based neuroimaging |

## Eukaryotic cell lines

Policy information about [cell lines](#)

Cell line source(s)

Authentication

Mycoplasma contamination

Commonly misidentified lines (See [ICLAC](#) register)

## Animals and other organisms

Policy information about [studies involving animals](#); [ARRIVE guidelines](#) recommended for reporting animal research

Laboratory animals

Wild animals

Field-collected samples

Ethics oversight

Note that full information on the approval of the study protocol must also be provided in the manuscript.
